# Supplementary material for: Retinal Vasculature Reactivity During Flicker Light Provocation, Cardiac Stress and Stroke Risk in Africans: The SABPA Study
Source: Springer Nature journal article supplement (doi:10.1007/s12975-018-0673-4), 2018-11-09
Supplement: MOESM1 [file 16262256]

**SUPPLEMENTARY INFORMATION**

**Retinal vasculature reactivity during flicker-light-provocation, cardiac stress and stroke risk in Africans: The SABPA study**

**Short title:** Dynamic retinal vessel responses, cardiac troponin T, NT-proBNP and stroke risk

**Methods:** Retinal vessel analyses, defining diabetic/hypertensive retinopathy, diastolic ocular perfusion pressures

**Methods:** 24H Blood pressure measurements, Lifestyle confounders

**Results:** Table S1 Independent associations between dynamic retinal AUC changes and cardiac stress markers in Africans

**Results:** Figure S1, Probability of increased systemic cTnT levels with AV-nicking and CRVE > 248 MU in Africans. Strength of modelled relationships depicted as Nagelkerke2 values (R2).

**Authors:** Annemarie WENTZEL,*a* Leoné MALAN,*a* Wayne SMITH,*a,c* Roland VON KäNEL,*a,b* Nicolaas T MALAN.*a*

**Affiliations:**

aHypertension in Africa Research Team (HART), Centre of Excellence, North-West University, Potchefstroom, South Africa.

bDepartment of Consultation-Liaison Psychiatry and Psychosomatic Medicine, University Hospital Zurich, Switzerland Graphical abstract

cSouth African Medical Research Council, Unit for Hypertension and Cardiovascular Disease, North-West University, Potchefstroom, South Africa.

The present study was partially funded by the National Research Foundation, South African Medical Research Council, ROCHE Diagnostics, North-West University (Potchefstroom Campus), North-West Department of Education South Africa as well as the Metabolic Syndrome institute, France.

Disclaimers: NONE.

Any opinion, findings and conclusions or recommendations expressed in this material are those of the authors; therefore, funders do not accept any liability regarding this study.

**Corresponding Author:**

Prof Leoné Malan (RN, PhD), Hypertension in Africa Research Team (HART); Centre of Excellence; Faculty of Health Sciences, Private Bag X6001, North-West University, Potchefstroom, 2520, SOUTH AFRICA

Tel +27 18 2992438; E-mail: [Leone.Malan@nwu.ac.za](mailto:Leone.Malan@nwu.ac.za)

**Methods: *Retinal vessel analyses [As described by Smith W, Vilser W, Kotliar K, 2018; submitted TVST-18-0913]***

All Retinal vessel analyses were done with the IMEDOS Retinal vessel analyzer (RVA) (Germany), fitted with a Zeiss FF450plus) camera and the VesselMap 1 Version 3.10 software. Dynamic retinal analyses were completed using a standard flicker protocol by IMEDOS Systems as previously described (Kotliar et al. 2011). As previously stated, we will refer to flicker light induced provocation as FLIP. During FLIP, the duration of the baseline was 50 seconds, followed by a 20 second flicker period and an 80 second recovery (also referred to as second baseline) period. There were 3 flicker cycles in total, lasting an added total of 350 seconds for the entire measurement. The camera was set at a 30°degree angle with the participant focusing on the tip of a fixation rod, and an artery and vein segment (as long as possible) were primarily selected in the upper or lower temporal quadrant of the fundus image. This selection was about 0.5-2.0 optic disc diameters away from the margin of the optic disc. The quality of the FLIP measurements for each participant was assessed subjectively using a newly developed, previously described, scoring method. FLIP measurements were included provided that: 1) Analysis of the raw data was at least possible, 2) at least one good flicker was present (baseline/FLIP pattern), 3) measuring points during the flicker were consistent, 4) there was low noise and 5) there were almost no gaps in the measurement curve. A score was given (0, 0.5 or 1) for each category and each of 5 categories contributed evenly for maximum of 5 points (0 = poor quality and 5 = excellent quality; in extreme cases a negative score could be allocated). In the current study, we only included participants with a vessel measurement score equal to or greater than 2.5.

*Dynamic Vessel Analyses (DVA)*

The raw numerical data generated from the retinal vessel analyzer (RVA) was exported to an Excel template (Microsoft) with macros to allow further filtering, processing and analysis of the data. As described by Smith et al (2018) data were extracted from all three FLIP curves and median values for each 1 second time point, and average summary curve of one cycle, were calculated. The average curves were smoothed by calculating a running median with a window covering 5 seconds (Smith et al, 2018).

Absolute vessel diameters (measured in standardized measuring units (MU)) (Seifertl &  Vilser 2002) of the vessel segment was selected for each measurement. Each were calculated individually as the median value over the last 30 seconds of the first baseline phase prior to FLIP. Parameters derived from the smoothed averaged curve during FLIP, used in the current study, included:

- The percentage maximal dilation in response to FLIP (MDarteriole). The area under the reaction curve during flicker stimulation (AUC), calculated as a percentage change. The latter provided information on the curve form during FLIP (0-20s). For the values under the 100%-line the area was negative.
- The percentage absolute maximal constriction after FLIP (MC) was the minimum value occurring after maximum FLIP induced dilation and expressed a percentage from baseline.

*Blood pressure analyses during FLIP*

Event BP (Cardiotens CE120® (Meditech, Budapest, Hungary)) were done at both pre- and post-FLIP phases. The cuffed arm was relaxed and positioned along the side of the participant.

*Static Retinal Vessel Analyses*

The Visualis software was used to delineate all vessels’ calibres within 0.5 and 1 optic disc diameters from the margin of the optic disc. (VesselMap 2, Version 3.10 software,). The trunks of the vessels were selected. The central retinal artery calibre equivalent (CRAE) and the central retinal vein calibre, (CRVE) were calculated based on the Knudtson big six formula, and identified by two experienced scientists (Wong et al, 2011). As the image scale of each eye is unknown, the values of CRAE and CRVE were expressed as MU. The reproducibility coefficient was 0.84 and intra-class correlation Cronbach’s alpha-reliability index for the arteriolar:venular ratio (AVR) was 0.91 for a randomly selected cohort (Malan NT et al, 2015).

*Diastolic Ocular Perfusion Pressure*

A drop of local anaesthetic (Novasine Wander 0.4% Norvatis) was placed in the right eye prior to the measurement of the intra-ocular pressure (IOP) with the Tono-Pen Avia Applanation Tonometer (Reichert 7-0908 ISO 9001, New York USA). The right eye diastolic ocular perfusion pressure (DOPP) was calculated (Pre-FLIP DBP – IOP mmHg) and general retinopathy was diagnosed by a registered ophthalmologist.

*Defining hypertensive/diabetic retinopathy*

Diabetic retinopathy was established by an ophthalmologist at varying degrees of retinal abnormalities including retinal micro-aneurysms, exudates, haemorrhages and venous alterations (Grosso et al, 2011). Hypertensive retinopathy was characterized by a range of retinal vascular signs, such as focal or generalized arteriolar narrowing, arterio-venous nicking, retinal haemorrhages, micro-aneurysms, cotton-wool spots, hard exudates and cup-to-disk ratio – specifically in individuals with hypertensive BP values (Grosso et al, 2011).

**Methods:** ***Ambulatory Blood Pressure Monitoring (ABPM)***

The ABPM was programmed to measure BP at 30-min intervals during the day (07h00-22h00) and every hour during the evening (22h00-06h00). These are the time intervals shown for assessing sympathetic activity. The successful inflation rate was 85.8% (±9.14) and 90.4% (±8.61) in Africans and Caucasians respectively. CVD risk and hypertensive status were determined from 24h ABPM as systolic BP (SBP) ≥ 130mmHg and/or diastolic BP (DBP) ≥ 80mmHg. The apparatus was removed the following day, after the last BP measurement was recorded. Participants were also equipped with an Actiheart® (GB0/67703, CamNtech Ltd., Cambridgeshire, UK) used to obtain physical activity measurements.

**Methods:** ***Lifestyle confounders***

Body surface area (BSA) – calculated with the Mostellar formula – was measured by two qualified Level II anthropometrists in triplicate. The inter-and intra-observer variability was less than 10%. The Actiheart® (Montréal, Québec) determined total energy expenditure and was calculated in calories per 24h where the resting metabolic rate was also taken into account. Alcohol consumption was determined using gamma glutamyl transferase (γGT) as a biochemical marker (Hastedt et al., 2013; Tsai et al., 2012). Habitual smoking was determined via serum cotinine – a nicotine metabolite – values (Whittet et al., 1991; Seccareccia et al., 2003).

**Results: Table S1:** **Independent associations between dynamic retinal AUC changes and cardiac stress markers in Africans**

|  | **FLIP AUCarteriole**  **ß (95% CI)** | **FLIP AUCvenule**  **ß (95% CI)** |
| --- | --- | --- |
| **Adjusted R2** | 0.34 | 0.15 |
| **Age (yrs)** | -0.33 (-0.41, -0.25) *p*<0.001 | - |
| **cTnT (pg/mL)** | -0.12 (-0.29, 0.05)  *p*=0.081 | - |
| **NT-proBNP (pg/mL)** | -0.12 (-0.30, -0.06)  *p*=0.049 | NS |
| **DOPP (mmHg)** | NS | - |

All analyses were adjusted for age, cotinine, TNF-α, total cholesterol: HDL-cholesterol ratio, glycated haemoglobin glucose (HbA1c), hypertensive/ diabetic retinopathy. For all dynamic retinal analyses, vessel segment diameter was included as a covariate. Abbreviations: FLIP, light flicker induced provocation; AUC, area under the curve; cTnT, cardiac troponin T; NT-proBNP, N-terminal pro-brain natriuretic peptide; DOPP, diastolic ocular perfusion pressure in the right eye.


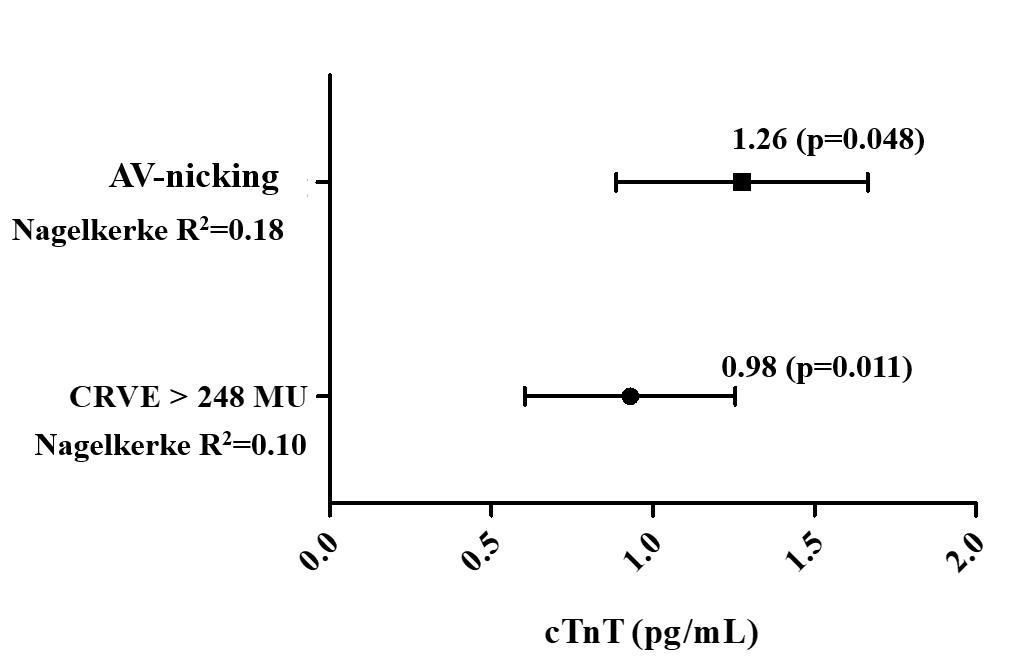


**Figure S1:** Probability of increased systemic cTnT levels with AV-nicking and CRVE > 248 MU in Africans. Strength of modelled relationships depicted as Nagelkerke2 values (R2).

*These odds ratios were exclusively present in Africans (N=107)
